# Supplementary material for: A Dimeric Thiourea CSA for the Enantiodiscrimination of Amino Acid Derivatives by NMR Spectroscopy
Source: PubMed Central journal article supplement (PMC8279476; doi:10.1021/acs.joc.1c00340), 2021-05-21
Supplement: jo1c00340_si_001.pdf [file jo1c00340_si_001.pdf]

# **A dimeric thiourea CSA for the enantiodiscrimination of amino acid derivatives by NMR spectroscopy**

Alessandra Recchimurzo,† Cosimo Micheletti,† Gloria Uccello Barretta and Federica Balzano\*

Department of Chemistry and Industrial Chemistry, University of Pisa, via Moruzzi 13, 56124 Pisa, Italy.

†The authors contributed equally to this work.

\*[federica.balzano@unipi.it](mailto:federica.balzano@unipi.it)

**Supporting Information**

## Table of Contents

|                                                                                                                                                                                 |     |
|---------------------------------------------------------------------------------------------------------------------------------------------------------------------------------|-----|
| Nonequivalences of NH and CH protons of amino acid derivatives in the presence of DABCO and <b>BTDA</b> (Figures S1-S2).                                                        | S3  |
| 1D-ROESY and 1D-TOCSY spectra of ( <i>S</i> )- <b>10</b> / <b>BTDA</b> /DABCO and ( <i>R</i> )- <b>10</b> / <b>BTDA</b> /DABCO mixtures (Figure S3).                            | S5  |
| <sup>1</sup> H complexation shifts of amino acid derivatives in the presence of DABCO and <b>BTDA</b> (Table S1).                                                               | S5  |
| Enantiodiscrimination of <b>10</b> in the presence of <b>BTDA</b> and DABCO or DMAP ( <sup>1</sup> H NMR spectra, Figure S4).                                                   | S6  |
| Enantiodiscrimination of <b>10</b> in the presence of <b>BTDA</b> or <b>BTDA</b> /DABCO ( <sup>1</sup> H NMR spectra, Figure S5).                                               | S6  |
| Stoichiometry determination for ( <i>R</i> )- <b>10</b> / <b>BTDA</b> /DABCO and ( <i>S</i> )- <b>10</b> / <b>BTDA</b> /DABCO (Figure S6).                                      | S6  |
| Enantiomeric purity determination (Table S2-S3).                                                                                                                                | S7  |
| 2D gHSQC map of racemic <b>10</b> / <b>BTDA</b> /DABCO (Figure S7).                                                                                                             | S8  |
| 2D gHMBC map of racemic <b>10</b> / <b>BTDA</b> /DABCO (Figure S8).                                                                                                             | S8  |
| 1D ROESY spectra (Figures S9-S12).                                                                                                                                              | S9  |
| <sup>1</sup> H NMR (600 MHz, CDCl <sub>3</sub> , 25 °C) and <sup>13</sup> C{ <sup>1</sup> H} NMR (150 MHz, CDCl <sub>3</sub> , 25 °C) spectra of <b>BTDA</b> (Figures S13-S14). | S11 |
| <sup>1</sup> H NMR (600 MHz, CDCl <sub>3</sub> , 25 °C) spectrum of <b>1-5</b> (30 mM) in the presence of 1 equivalent of <b>BTDA</b> (Figures S15-S19)                         | S13 |
| <sup>1</sup> H NMR (600 MHz, CDCl <sub>3</sub> , 25 °C) spectrum of <b>9-13</b> /DABCO (30 mM, 1:1) in the presence of 1 equivalent of <b>BTDA</b> (Figures S20-S24)            | S14 |

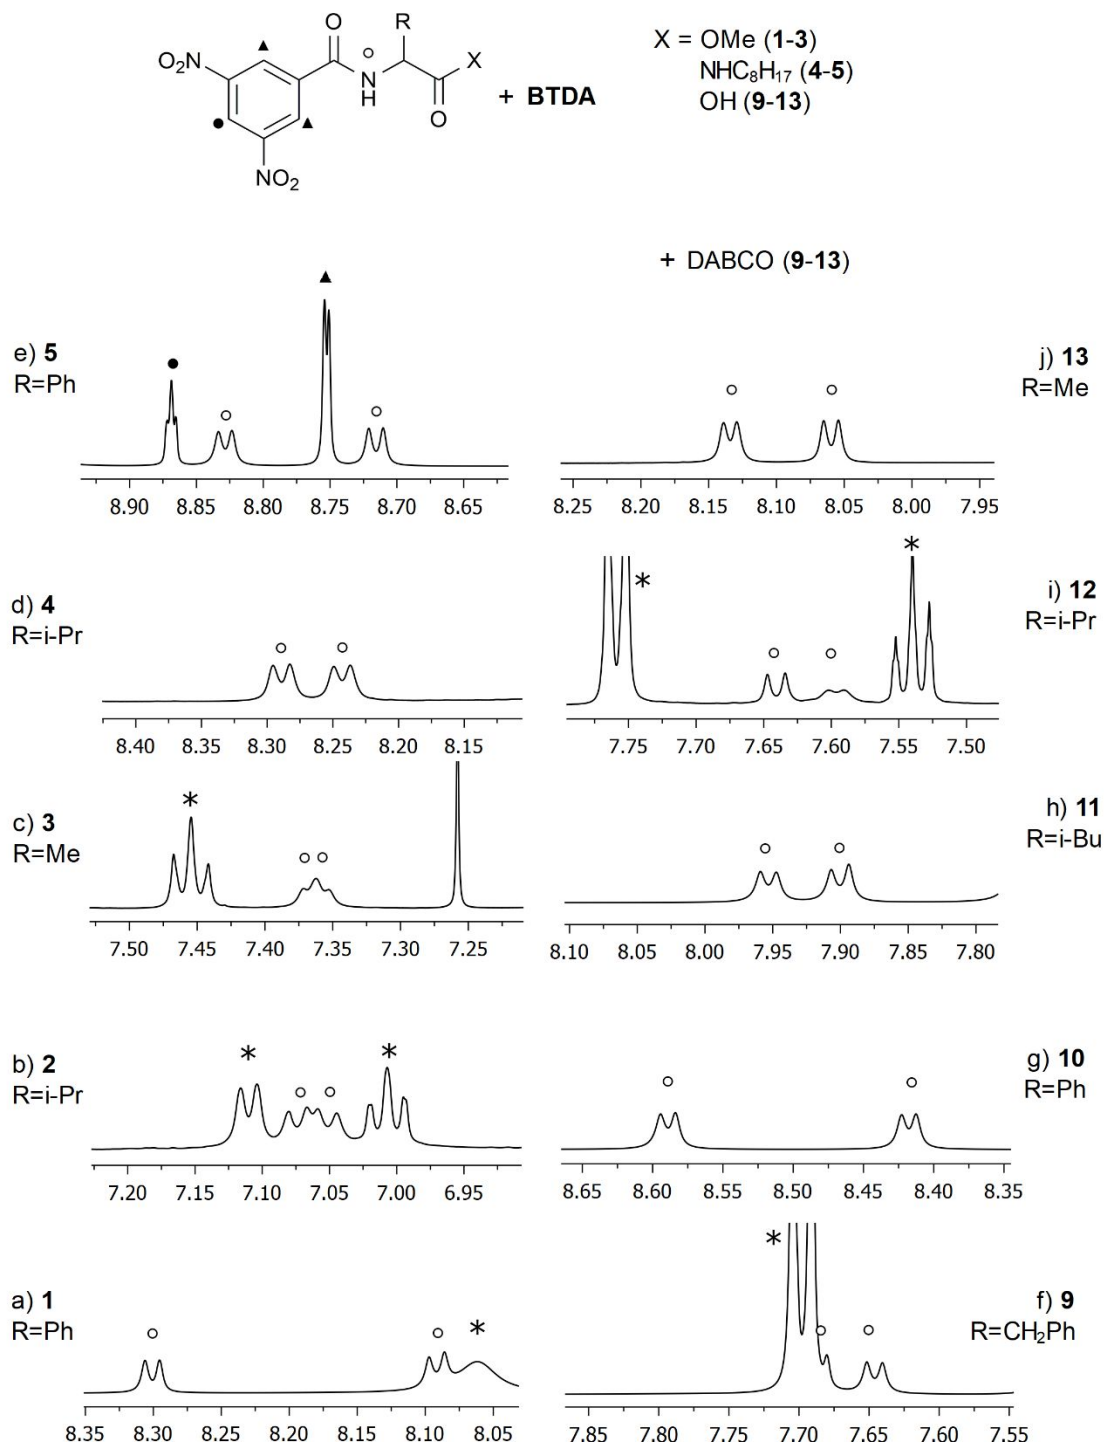

**Figure S1.** <sup>1</sup>H NMR (600 MHz, CDCl<sub>3</sub>, 25 °C) spectral regions corresponding to NH protons of a 1-to-1 mixture of BTDA (30 mM)/racemic: a) **1**, b) **2**, c) **3**, d) **4**, e) **5**, and of 1-to-1-to-1 mixture BTDA (30 mM)/DABCO/racemic: f) **9**, g) **10**, h) **11**, i) **12**, j) **13**. \*Resonance of CSA.

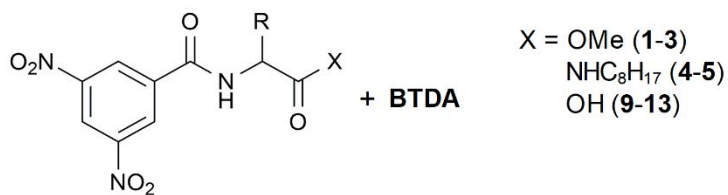

+ DABCO (9-13)

e) **5**  
R=Ph

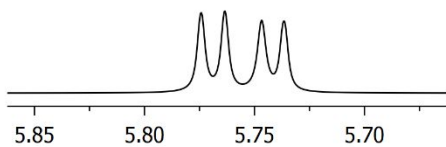

j) **13**  
R=Me

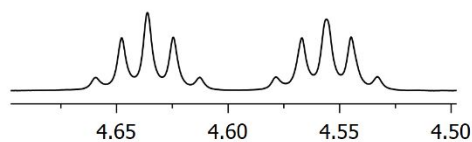

d) **4**  
R=i-Pr

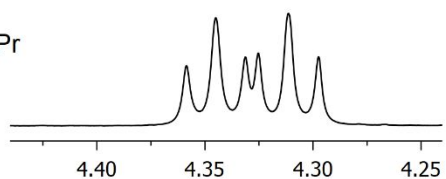

i) **12**  
R=i-Pr

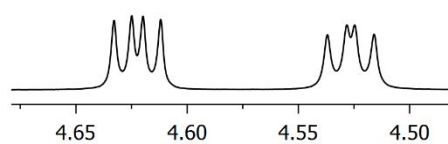

c) **3**  
R=Me

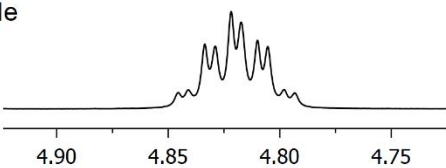

h) **11**  
R=i-Bu

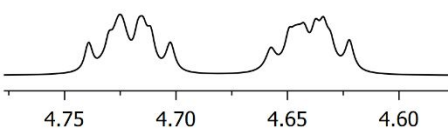

b) **2**  
R=i-Pr

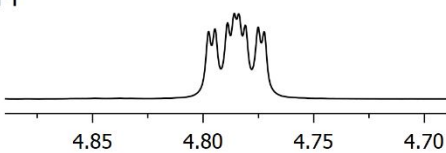

g) **10**  
R=Ph

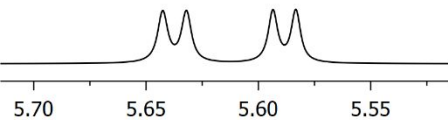

a) **1**  
R=Ph

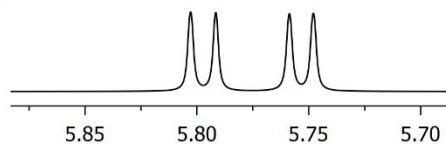

f) **9**  
R=CH<sub>2</sub>Ph

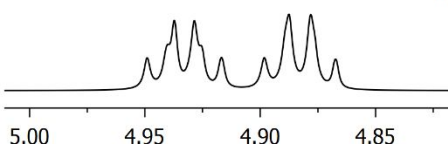

**Figure S2.** <sup>1</sup>H NMR (600 MHz, CDCl<sub>3</sub>, 25 °C) spectral regions corresponding to methine protons of a 1-to-1 mixture of BTDA (30 mM)/racemic: a) **1**, b) **2**, c) **3**, d) **4**, e) **5**, and of 1-to-1-to-1 mixture BTDA (30 mM)/DABCO/racemic: f) **9**, g) **10**, h) **11**, i) **12**, j) **13**.

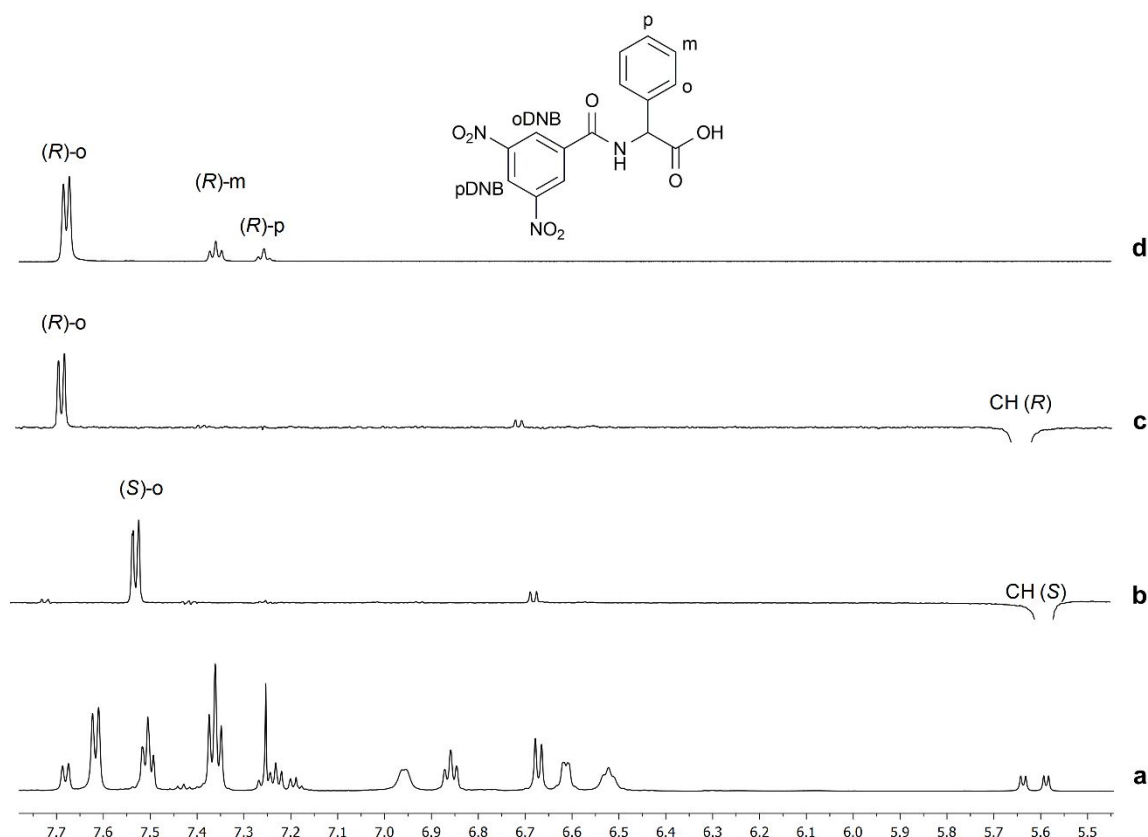

**Figure S3.**  $^1\text{H}$  NMR (600 MHz,  $\text{CDCl}_3$ , 30 mM, 25  $^\circ\text{C}$ ) spectral regions of **10**/**BTDA**/**DABCO** equimolar mixture (a); 1D-ROESY experiments (mix 0.4 s) with selective perturbation of CH in (*S*)-**10**/**BTDA**/**DABCO** (b) and (*R*)-**10**/**BTDA**/**DABCO** (c) equimolar mixtures; 1D-TOCSY experiment of ortho protons of substrate in (*R*)-**10**/**BTDA**/**DABCO** equimolar mixture (d).

**Table S1.** Complexation shifts (600 MHz,  $\text{CDCl}_3$ , 25  $^\circ\text{C}$ ,  $\Delta\delta = \delta_{\text{mixture}} - \delta_{\text{free}}$ , ppm) of **9-13** (30 mM) in the presence of 1 equivalent of **DABCO** and **BTDA**.

| Substrate | $\Delta\delta$ (ppm) |                   |                 |            |
|-----------|----------------------|-------------------|-----------------|------------|
|           | pDNB <sup>a</sup>    | oDNB <sup>b</sup> | CH <sup>c</sup> | NH         |
| <b>9</b>  | -0.181 (R)           | -0.204 (R)        | +0.147 (R)      | -0.057 (R) |
|           | -0.092 (S)           | -0.035 (S)        | +0.097 (S)      | -0.015 (S) |
| <b>10</b> | -0.283 (R)           | -0.255 (R)        | +0.174 (R)      | +0.230 (R) |
|           | -0.067 (S)           | -0.008 (S)        | +0.125 (S)      | +0.057 (S) |
| <b>11</b> | -0.254 (R)           | -0.198 (R)        | +0.092 (R)      | -0.089 (R) |
|           | -0.074 (S)           | +0.062 (S)        | +0.012 (S)      | -0.036 (S) |
| <b>12</b> | -0.206 (R)           | -0.195 (R)        | +0.090 (R)      | +0.092 (R) |
|           | -0.061 (S)           | +0.007 (S)        | -0.006 (S)      | +0.047 (S) |
| <b>13</b> | -0.234 (R)           | -0.198 (R)        | +0.154 (R)      | +0.195 (R) |
|           | -0.060 (S)           | +0.055 (S)        | +0.073 (S)      | +0.269 (S) |

<sup>a</sup>Para proton of DNB moiety. <sup>b</sup>Ortho protons of DNB moiety. <sup>c</sup>Methine proton of chiral center.

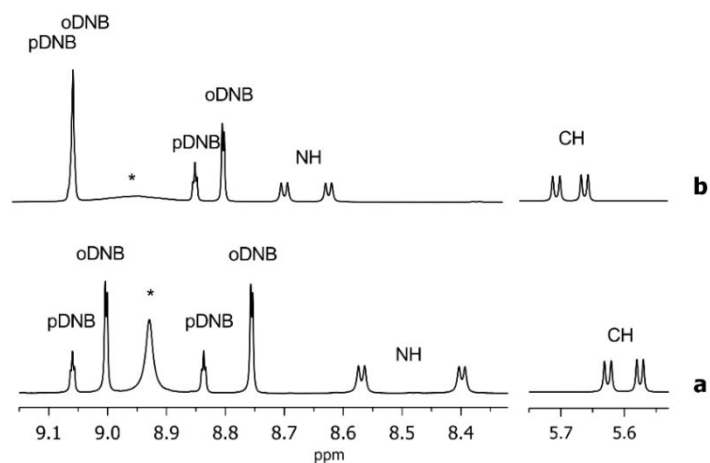

**Figure S4.** <sup>1</sup>H NMR (600 MHz, CDCl<sub>3</sub>, 25 °C) spectral regions corresponding to the *ortho*- and *para*-DNB, NH and methine protons of **10** (30 mM) in 1:1:1 mixture: a) **10**/BTDA/DABCO, b) **10**/BTDA/DMAP. \*indicates CSA signals.

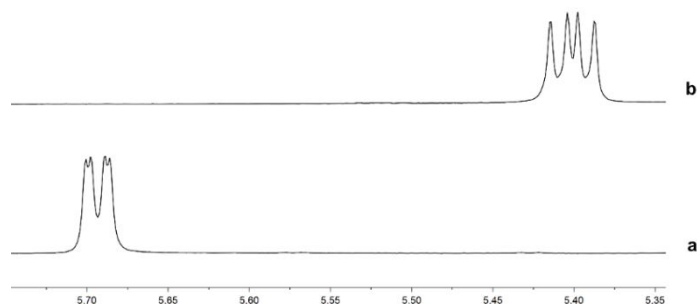

**Figure S5.** <sup>1</sup>H NMR (600 MHz, CDCl<sub>3</sub>/DMSO-d<sub>6</sub>, 25 °C) spectral regions corresponding to CH proton of **10** (30 mM) in BTDA/**10** (a) and in BTDA/**10**/DABCO (b) mixtures (1:1:1).

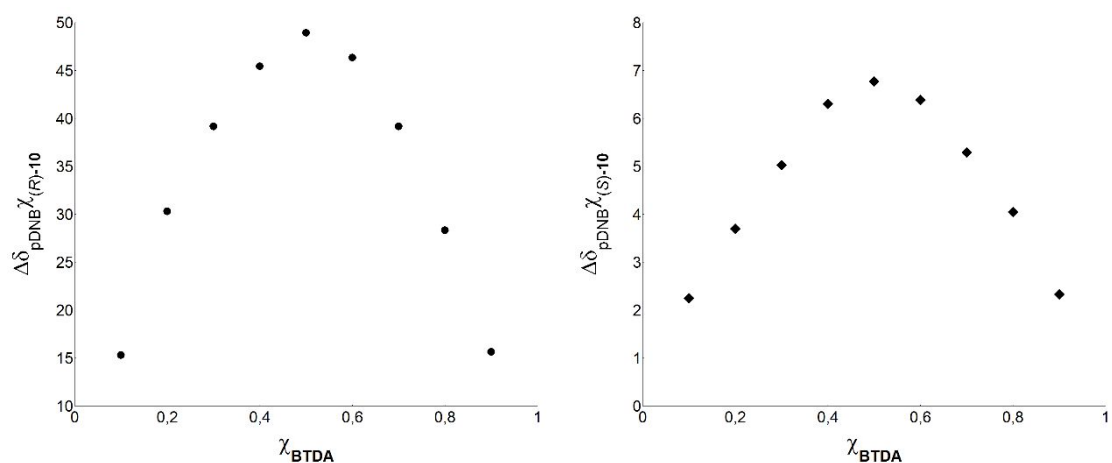

**Figure S6.** Stoichiometry determination based on *para* protons of DNB group for *(R)*-**10**/BTDA/DABCO (●) and *(S)*-**10**/BTDA/DABCO (◆) complexes.

**Table S2.** Comparison between the data of actual enantiomeric excess (ee %) of (*S*)-**10**, calculated from the mixed volumes of pure enantiomer stock solutions, and ee (%) of (*S*)-**10** determined by integration of the <sup>1</sup>H-NMR signals relating to the NH proton of **10** in **10**/BTDA/DABCO mixtures

| Actual ee (%) | ee by NMR (%) |
|---------------|---------------|
| 90            | 90.26         |
| 80            | 80.52         |
| 60            | 59.72         |
| 40            | 40.26         |
| 20            | 19.76         |
| 0             | 0.12          |
| -20           | -20.14        |
| -40           | -40.22        |
| -60           | -60.46        |
| -80           | -80.58        |
| -90           | -90.24        |
| -99.4         | -99.50        |

**Table S3.** Enantiomeric excess (ee %) determined by <sup>1</sup>H-NMR integration of signals for substrates **9-13** (30 mM, R:S=99:1, ee 98%) in the presence of BTDA/DABCO (30 mM, 1:1)

|           | ee by NMR (%) |
|-----------|---------------|
| <b>9</b>  | -97.70        |
| <b>10</b> | -98.22        |
| <b>11</b> | -97.86        |
| <b>12</b> | -98.18        |
| <b>13</b> | -98.26        |

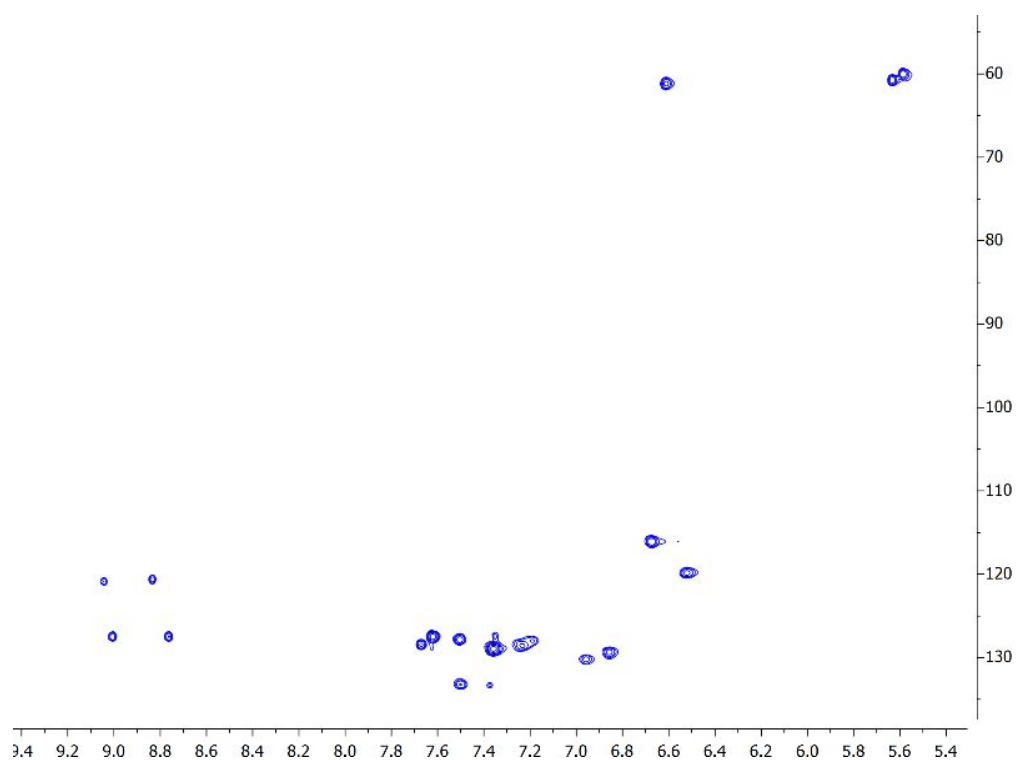

**Figure S7.** 2D gHSQC map (600 MHz, 30 mM, 25 °C, CDCl<sub>3</sub>) of equimolar mixture of racemic **10**/BTDA/DABCO.

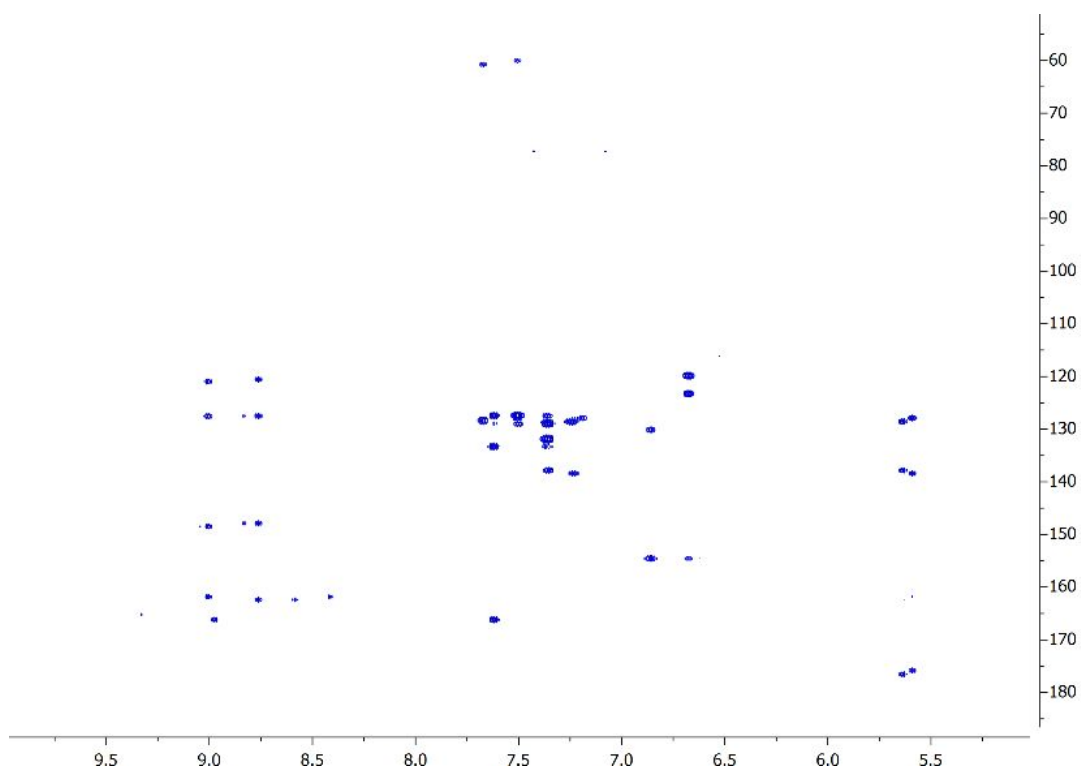

**Figure S8.** 2D gHMBC map (600 MHz, 30 mM, 25 °C, CDCl<sub>3</sub>) of equimolar mixture of racemic **10**/BTDA/DABCO.



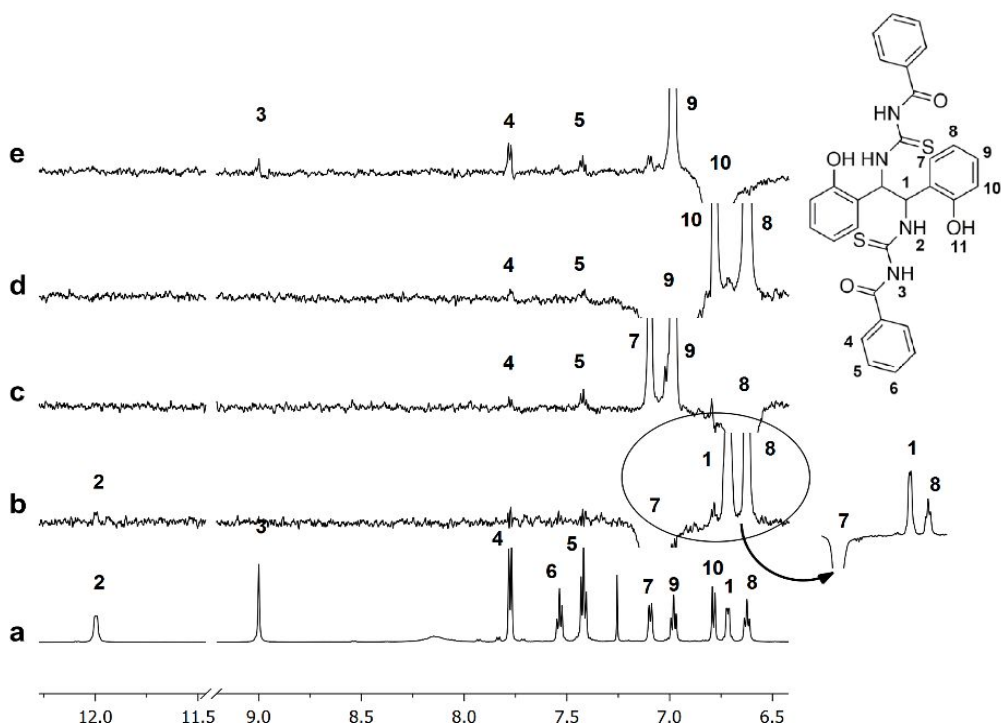

**Figure S9.**  $^1\text{H}$  NMR spectrum (600 MHz, 30 mM,  $\text{CDCl}_3$ , 25  $^\circ\text{C}$ ) of BTDA (a) and 1D-ROESY experiments (mix 0.4 s) with selective perturbation of  $\text{H}_7$  (b),  $\text{H}_8$  (c),  $\text{H}_9$  (d), and  $\text{H}_{10}$  (e) protons.

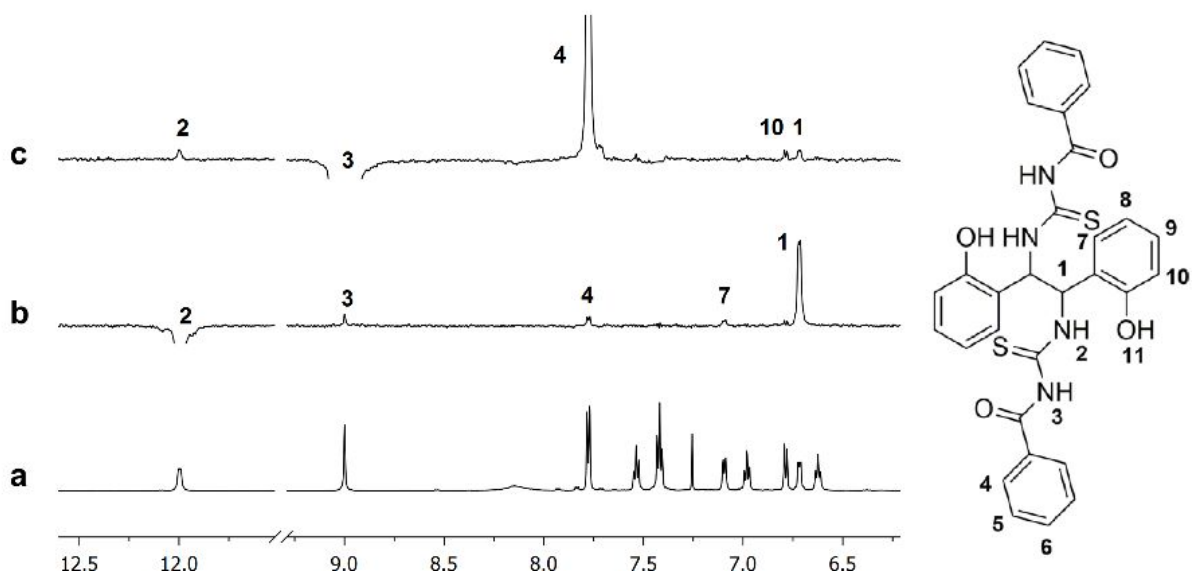

**Figure S10.**  $^1\text{H}$ -NMR spectrum (600 MHz, 30 mM,  $\text{CDCl}_3$ , 25  $^\circ\text{C}$ ) of BTDA (a) and 1D-ROESY experiments (mix 0.4 s) with selective perturbation of  $\text{N-H}_2$  (b) and  $\text{N-H}_3$  (c).

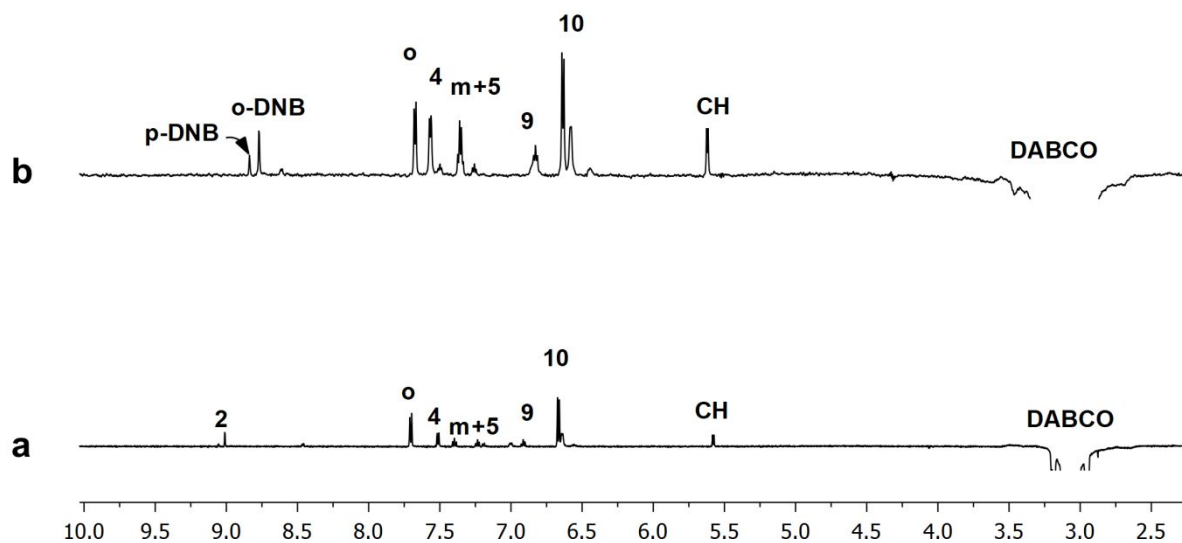

**Figure S11.** 1D-ROESY experiments (600 MHz, 30 mM,  $\text{CDCl}_3$ , 25 °C, mix 0.4 s) with selective perturbation of DABCO protons in (*S*)-**10**/BTDA/DABCO (a) and (*R*)-**10**/BTDA/DABCO (b) mixtures (1:1:1).

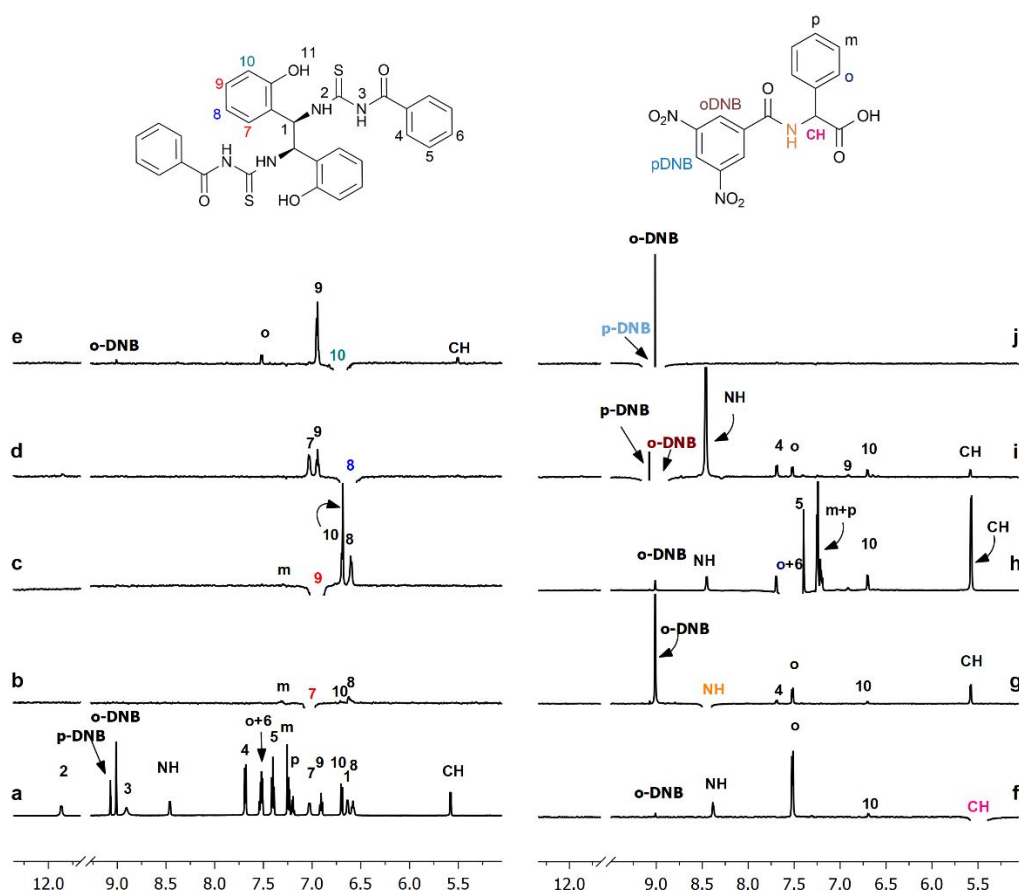

**Figure S12.**  $^1\text{H}$ -NMR (600 MHz,  $\text{CDCl}_3$ , 30 mM, 25 °C) spectrum of (*S*)-**10**/BTDA/DABCO equimolar mixture (a) and 1D-ROESY experiments (mix 0.4 s) with selective perturbation of  $\text{H}_7$  (b),  $\text{H}_9$  (c),  $\text{H}_8$  (d),  $\text{H}_{10}$  (e), CH (f), NH (g),  $\text{H}_o$  (h),  $\text{H}_{o\text{-DNB}}$  (i),  $\text{H}_{p\text{-DNB}}$  (j) protons.

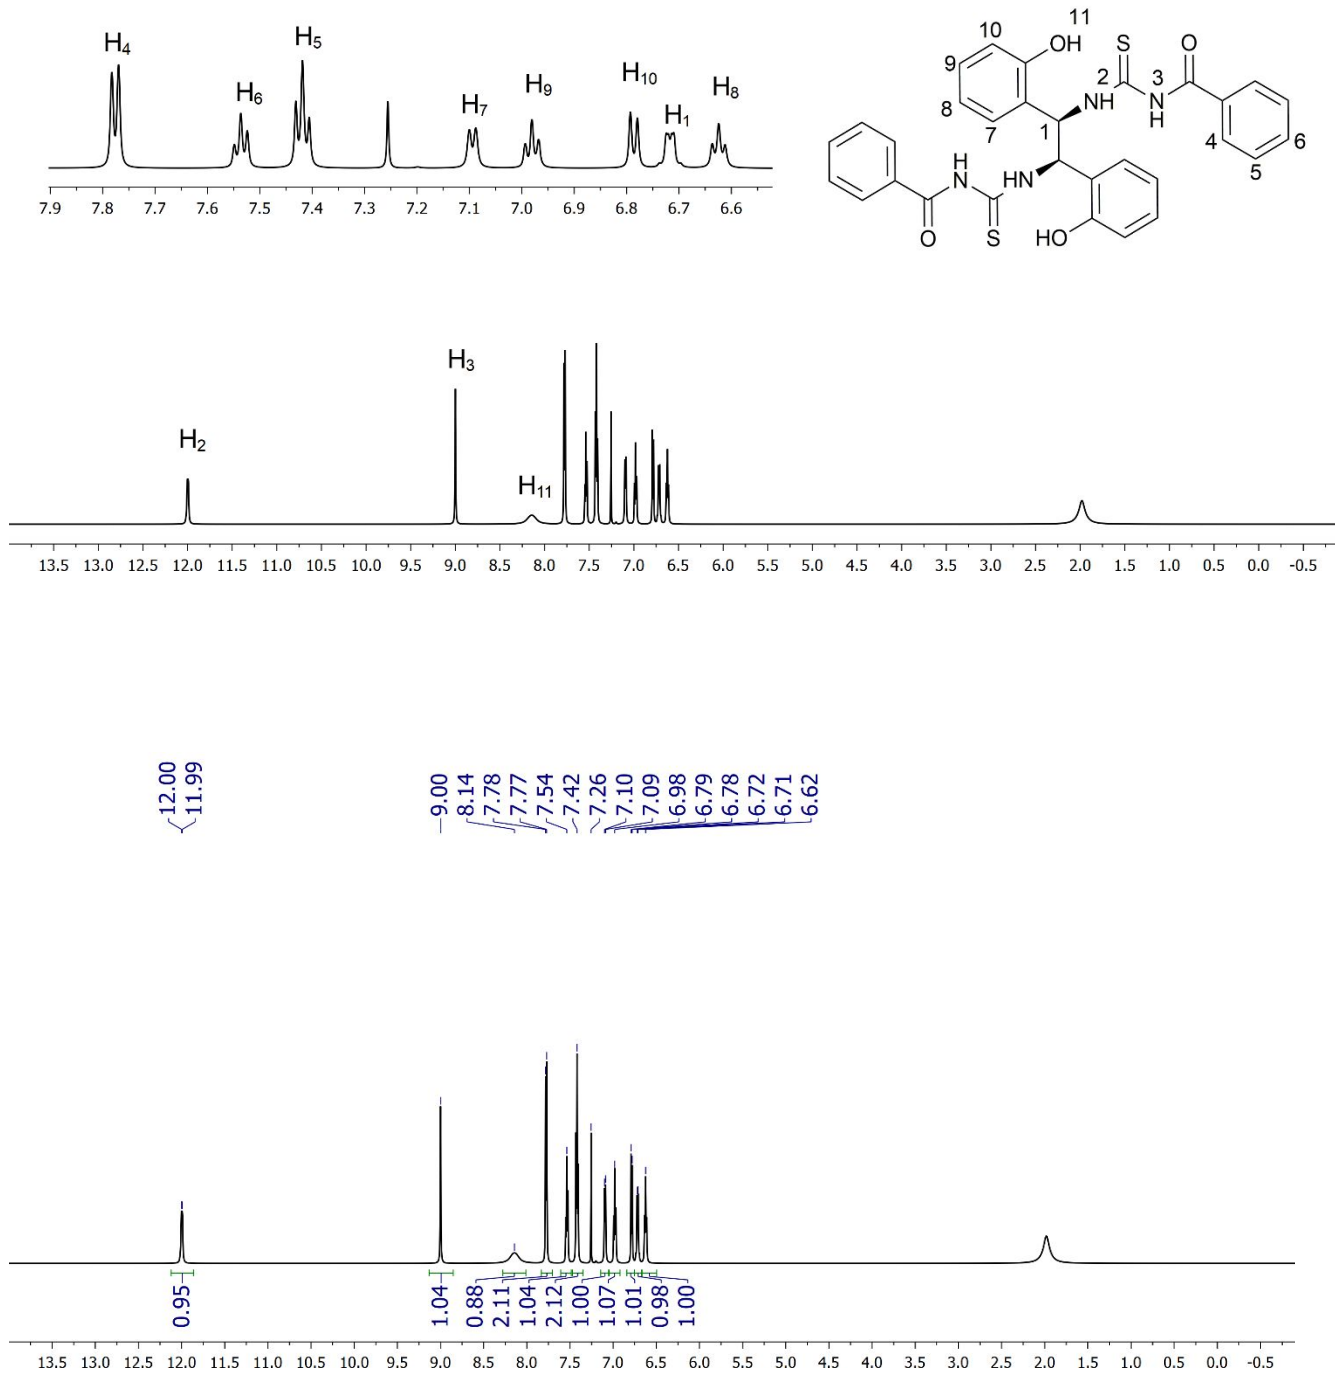

**Figure S13.** <sup>1</sup>H NMR (600 MHz, CDCl<sub>3</sub>, 25 °C) spectrum of BTDA.

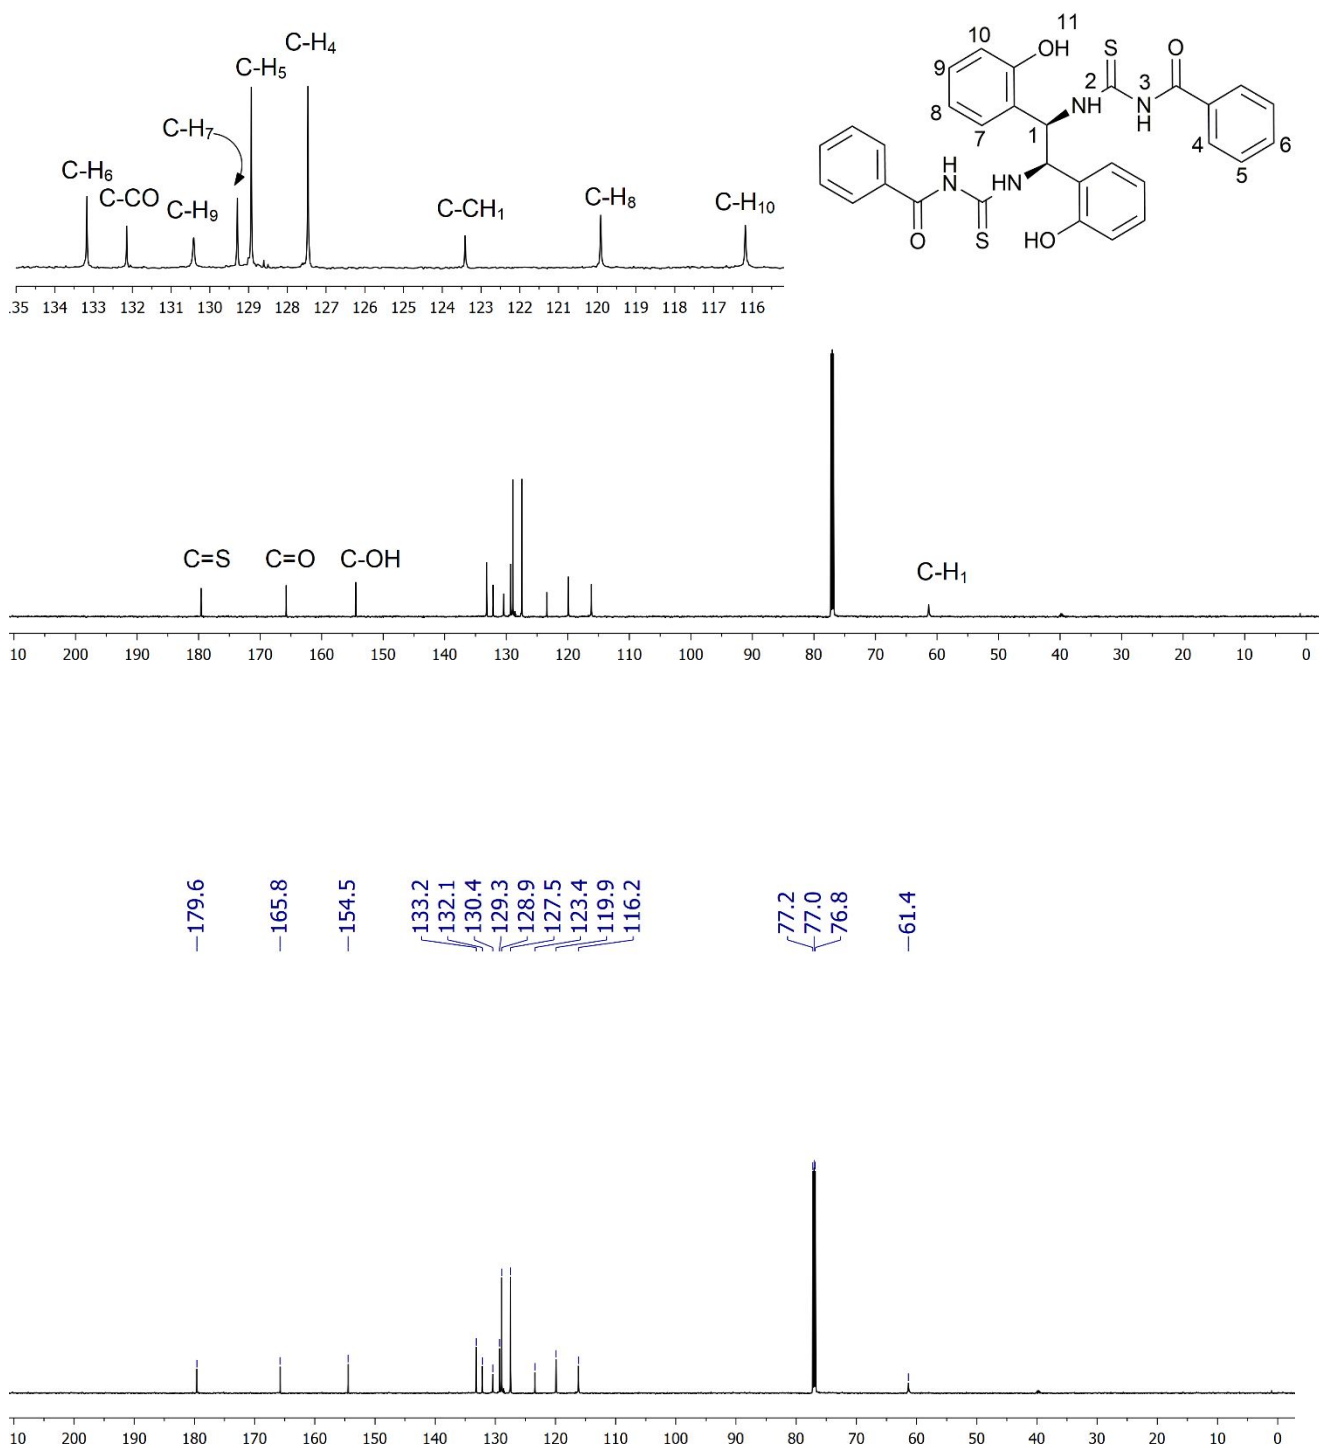

Figure S14.  $^{13}\text{C}\{^1\text{H}\}$  NMR (150 MHz,  $\text{CDCl}_3$ , 25  $^\circ\text{C}$ ) spectrum of BTDA.

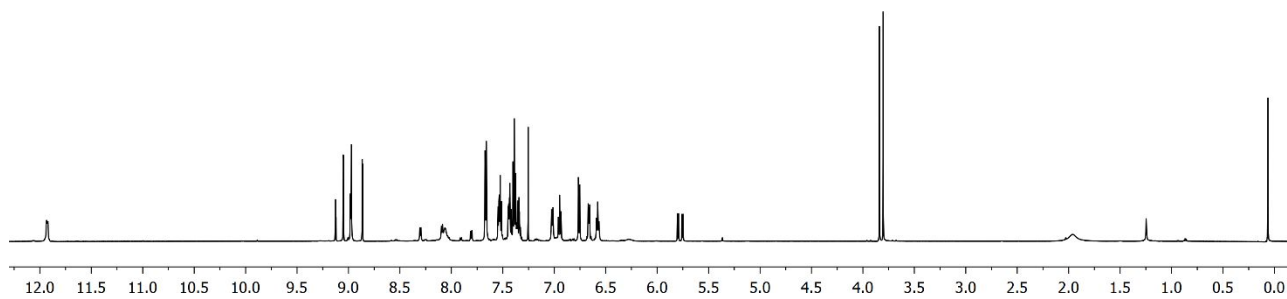

**Figure S15.**  $^1\text{H}$  NMR (600 MHz,  $\text{CDCl}_3$ , 25  $^\circ\text{C}$ ) spectrum of equimolar mixture **1**/BTDA (30 mM).

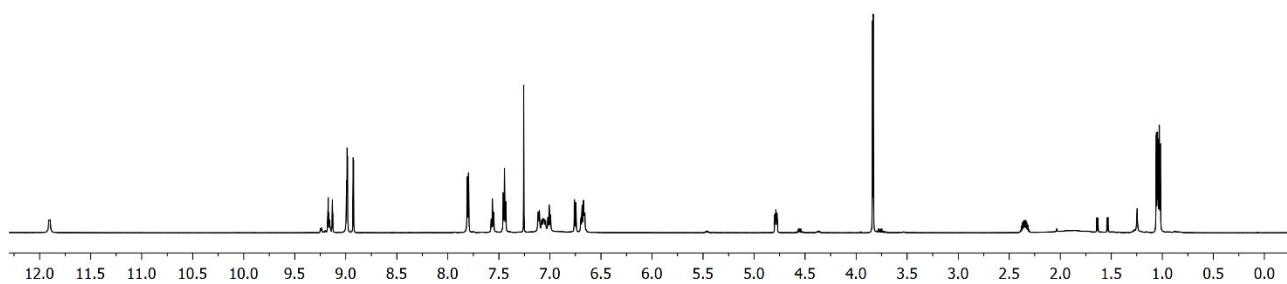

**Figure S16.**  $^1\text{H}$  NMR (600 MHz,  $\text{CDCl}_3$ , 25  $^\circ\text{C}$ ) spectrum of equimolar mixture **2**/BTDA (30 mM).

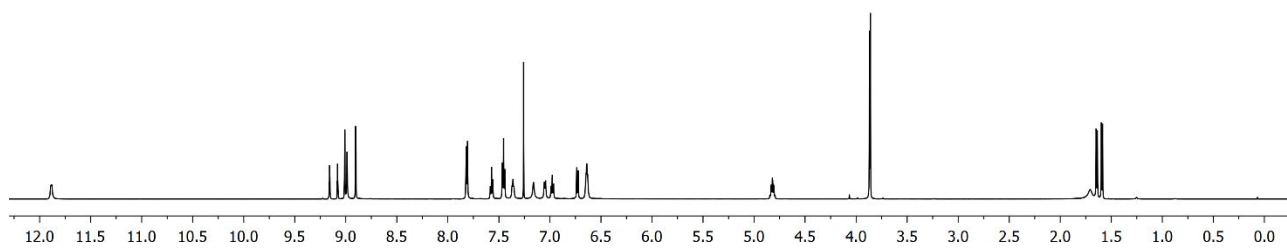

**Figure S17.**  $^1\text{H}$  NMR (600 MHz,  $\text{CDCl}_3$ , 25  $^\circ\text{C}$ ) spectrum of equimolar mixture **3**/BTDA (30 mM).

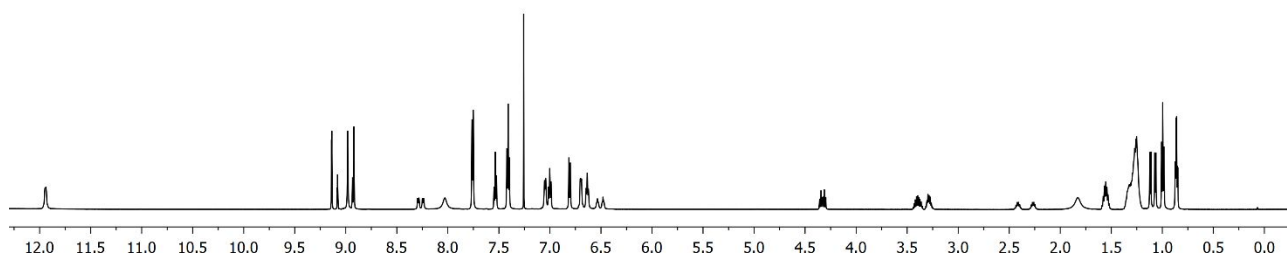

**Figure S18.**  $^1\text{H}$  NMR (600 MHz,  $\text{CDCl}_3$ , 25  $^\circ\text{C}$ ) spectrum of equimolar mixture **4**/**BTDA** (30 mM).

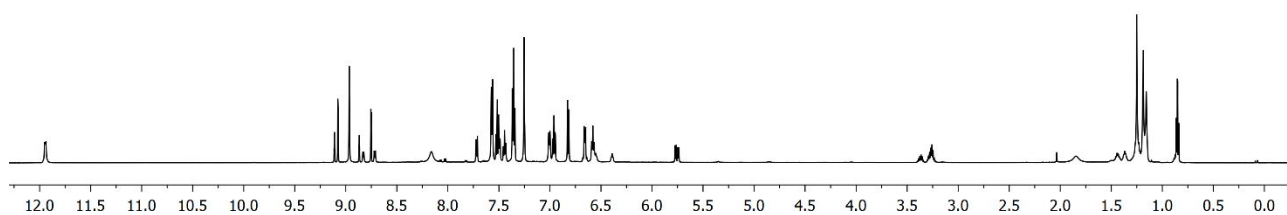

**Figure S19.**  $^1\text{H}$  NMR (600 MHz,  $\text{CDCl}_3$ , 25  $^\circ\text{C}$ ) spectrum of equimolar mixture **5**/**BTDA** (30 mM).

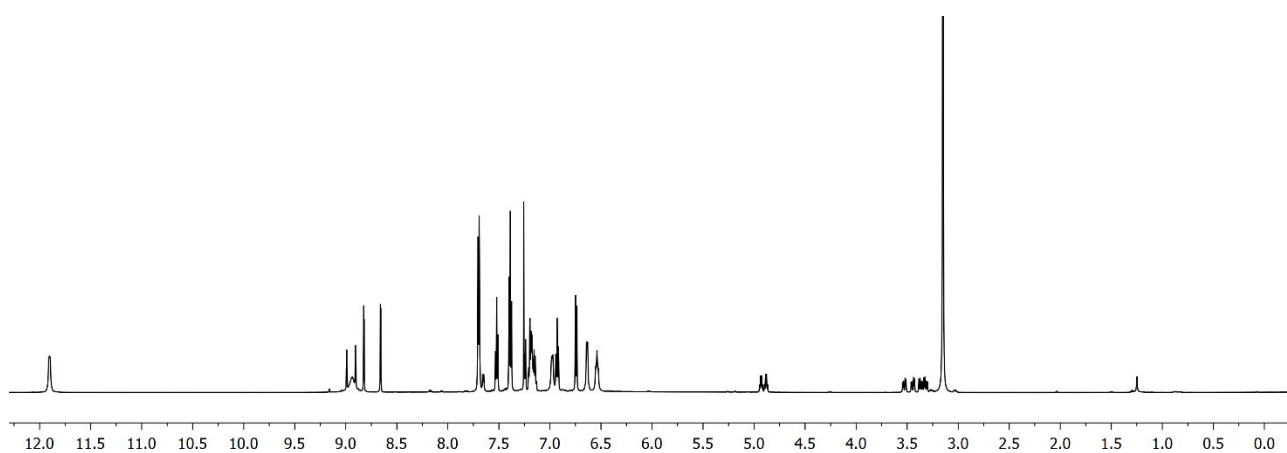

**Figure S20.**  $^1\text{H}$  NMR (600 MHz,  $\text{CDCl}_3$ , 25  $^\circ\text{C}$ ) spectrum of equimolar mixture **9**/**BTDA**/**DABCO** (30 mM).

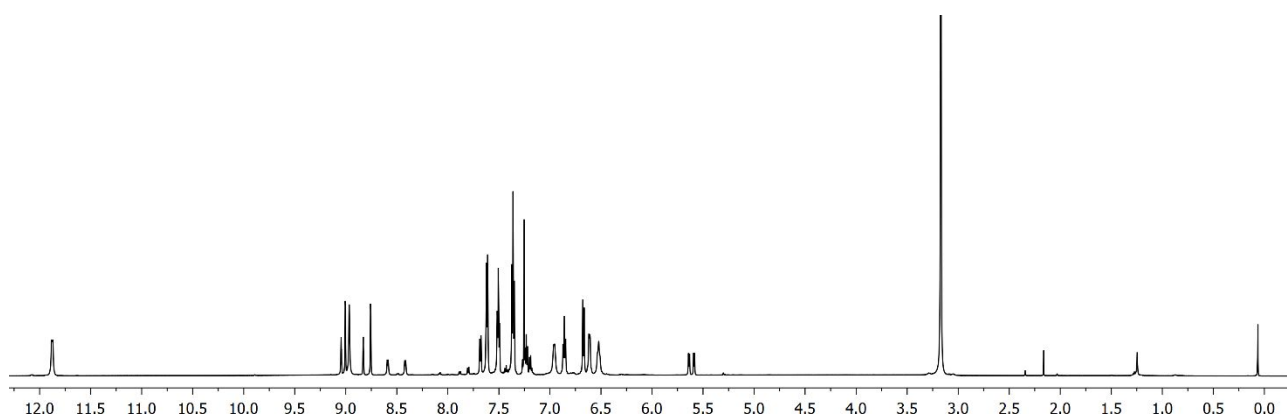

**Figure S21.**  $^1\text{H}$  NMR (600 MHz,  $\text{CDCl}_3$ , 25  $^\circ\text{C}$ ) spectrum of equimolar mixture **10**/BTDA/DABCO (30 mM).

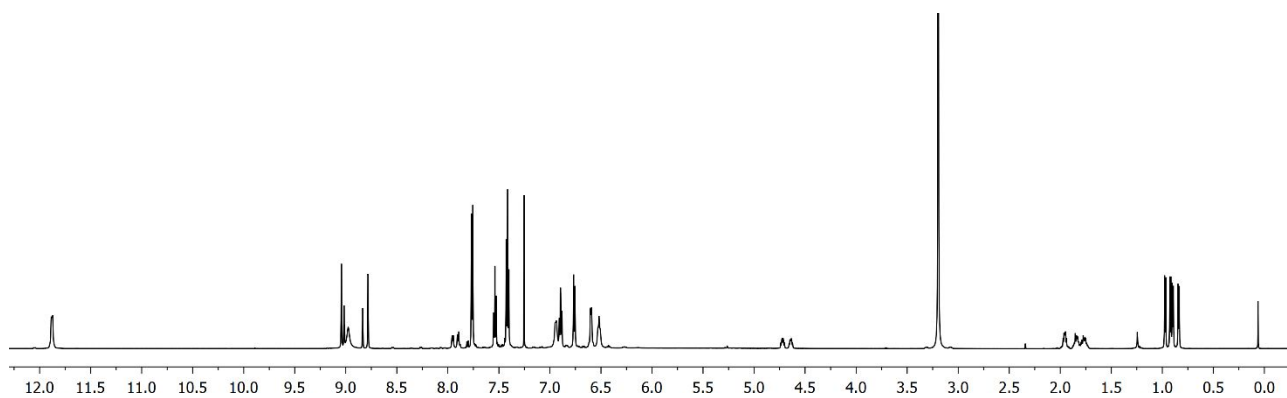

**Figure S22.**  $^1\text{H}$  NMR (600 MHz,  $\text{CDCl}_3$ , 25  $^\circ\text{C}$ ) spectrum of equimolar mixture **11**/BTDA/DABCO (30 mM).

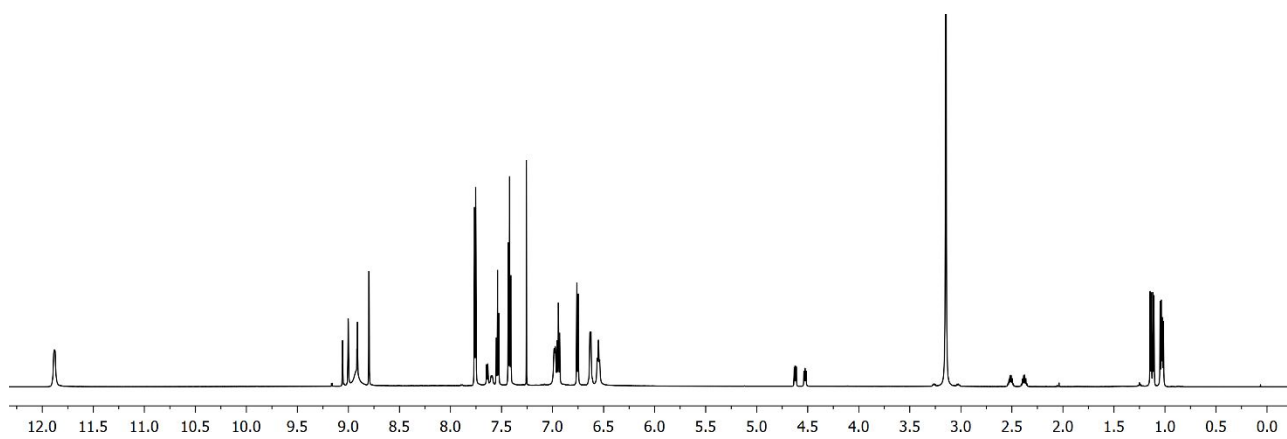

**Figure S23.**  $^1\text{H}$  NMR (600 MHz,  $\text{CDCl}_3$ , 25  $^\circ\text{C}$ ) spectrum of equimolar mixture **12**/BTDA/DABCO (30 mM).

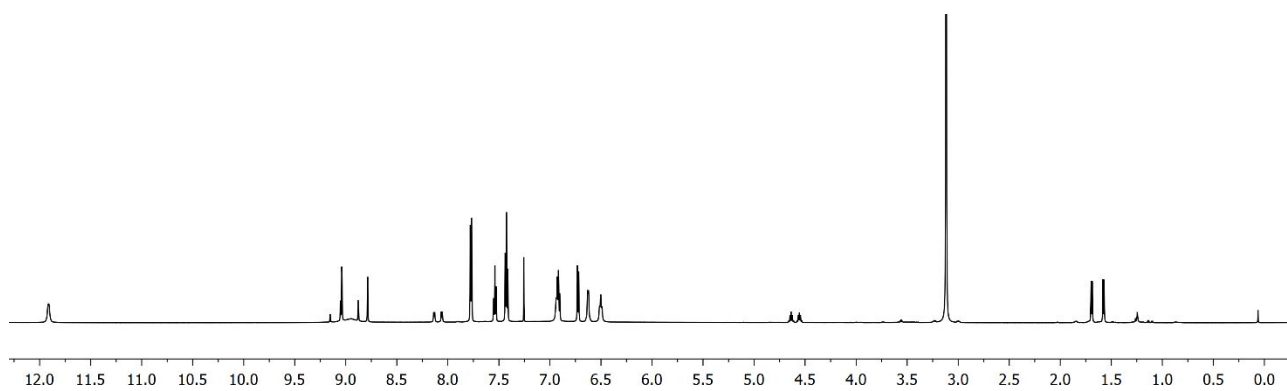

**Figure S24.**  $^1\text{H}$  NMR (600 MHz,  $\text{CDCl}_3$ , 25 °C) spectrum of equimolar mixture **13**/BTDA/DABCO (30 mM).
